# Supplementary material for: Structure and magnetism of a binuclear CuII pyrophosphate: transition to a 3D magnetic behaviour studied by single crystal EPR
Source: Royal Society of Chemistry journal article supplement (doi:10.1039/c4dt03616f), 2015-01-01
Supplement: c4dt03616f1.pdf [file c4dt03616f1.pdf]

### Electronic Supplementary Information

#### Structure and Magnetism of a Binuclear Cu<sup>II</sup> Pyrophosphate: Transition to a 3D Magnetic Behaviour Studied by Single Crystal EPR

Rosana P. Sartoris, Otaciro R. Nascimento, Ricardo C. Santana, MireillePerec, Ricardo F. Baggio and Rafael Calvo

**Fig. S1:** Full set of spectra observed between 4.7 and 50 K for the magnetic field applied at 132° with the *x* axis in the *xy* laboratory plane, as shown in the inset of Figure 4.

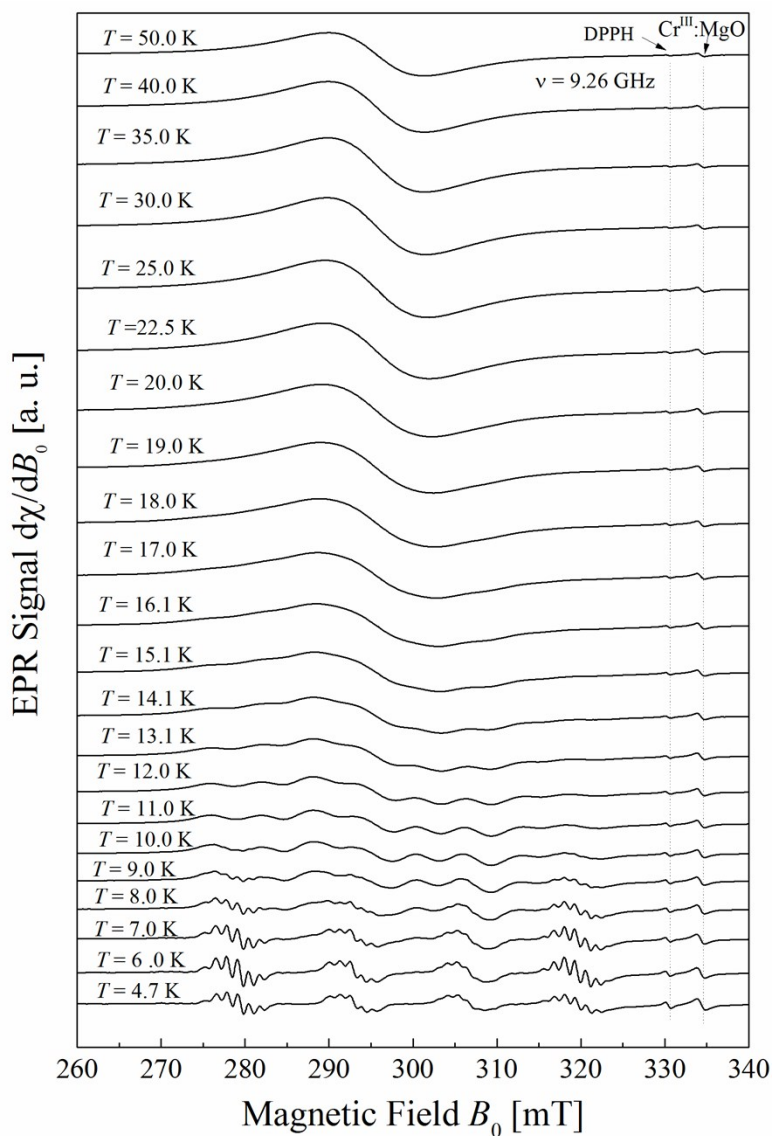

**Fig. S2:** Enlarged view of Figure 4a showing the dinuclear hyperfine splitting of the copper resonance at 4.7 K (black line) for the magnetic field orientate in the xy plane at  $132^\circ$  of the x axes. The red lines are simulated with the components of the  $g_{M1}$  and  $A_{M1}$  matrices given in Table 5 and assuming  $A_{N1} = 8.7 \cdot 10^{-4} \text{ cm}^{-1}$  and  $A_{N2} = 12 \cdot 10^{-4} \text{ cm}^{-1}$ . The red vertical line in the inset a) and b) indicates the field orientation where the data were obtained.

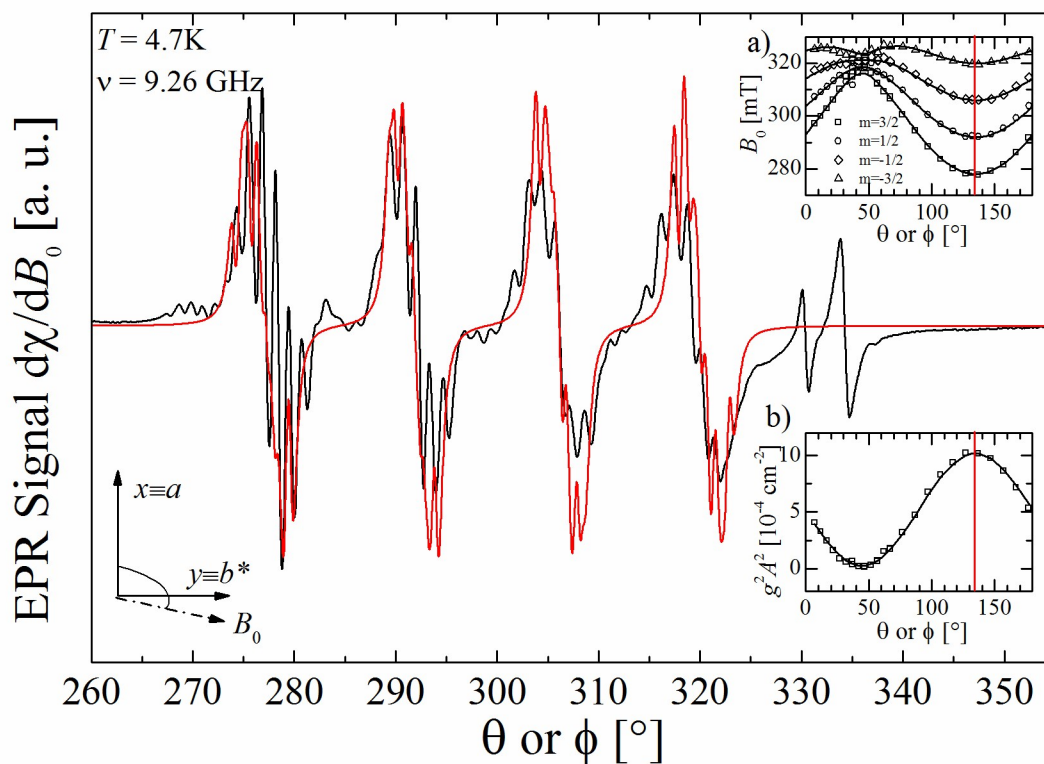

**Fig. S3:** Enlarged view of Figure 4d showing the dinuclear hyperfine splitting of the copper resonance at 12 K for the magnetic field orientation described in the inset of Figure 4. The resolution is poorer for other orientations of  $B_0$ . The dinuclear spectra (red line) are simulated using Easyspin, a package of programs working under Matlab. The peak indicated with a red arrow is the high field peak of the mononuclear site  $M_1$ .

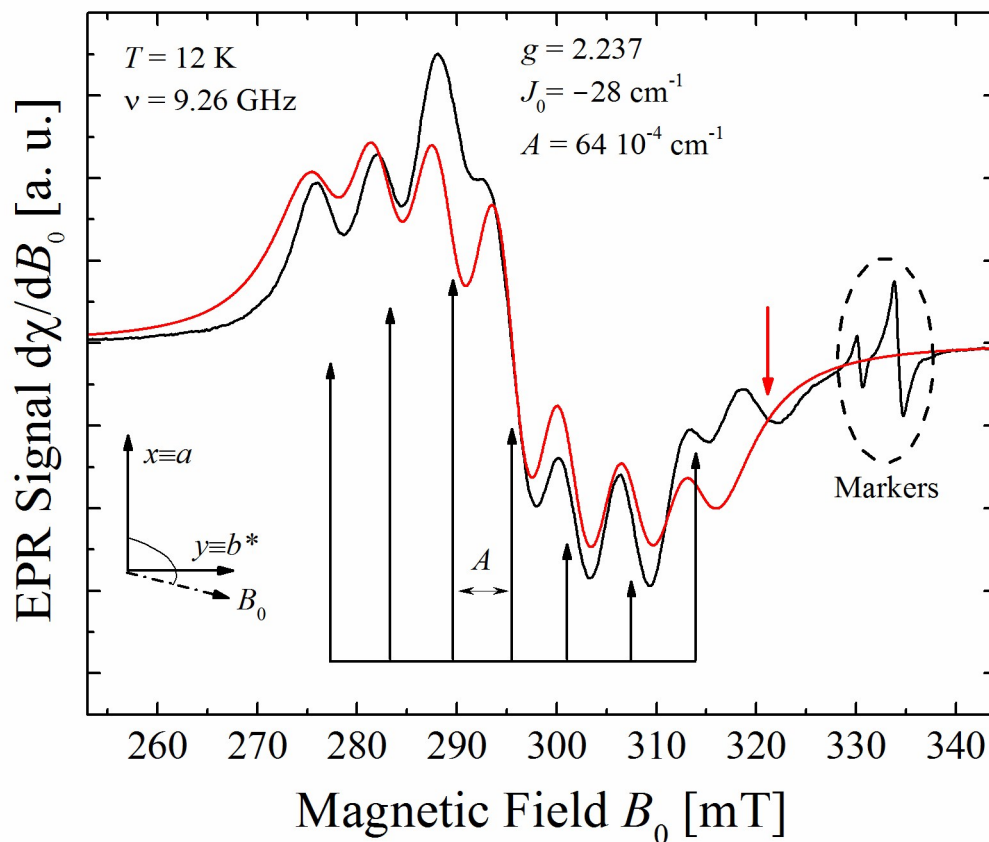

**Fig. S4:** Angular variation of the field position of the copper hyperfine transitions observed for the site  $M_2$  in the three planes of the  $xyz$  laboratory system. The red stars in a) indicate the centers of the copper hyperfine groups of the site  $M_1$ . The uncertainties are much larger than those for site  $M_1$ , displayed in Figure 6.

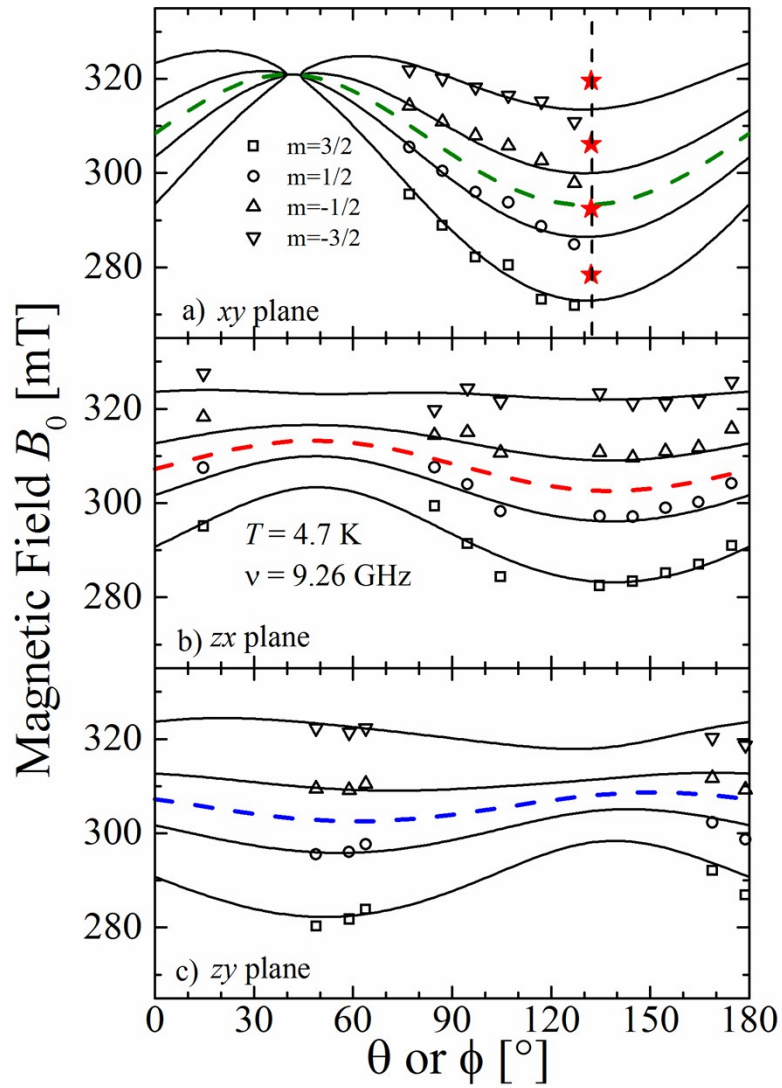

**Fig. S5** Values of  $g^2$  (a) and  $g^2A^2$  (b) calculated from the field positions shown in Figure S3 for the mononuclear site  $M_2$ . The solid lines are obtained with the  $\mathbf{g}_{M_2}$  and  $\mathbf{A}_{M_2}$  matrices given in Table S1. The uncertainties are much larger than those for site  $M_1$ , displayed in Figure 7.

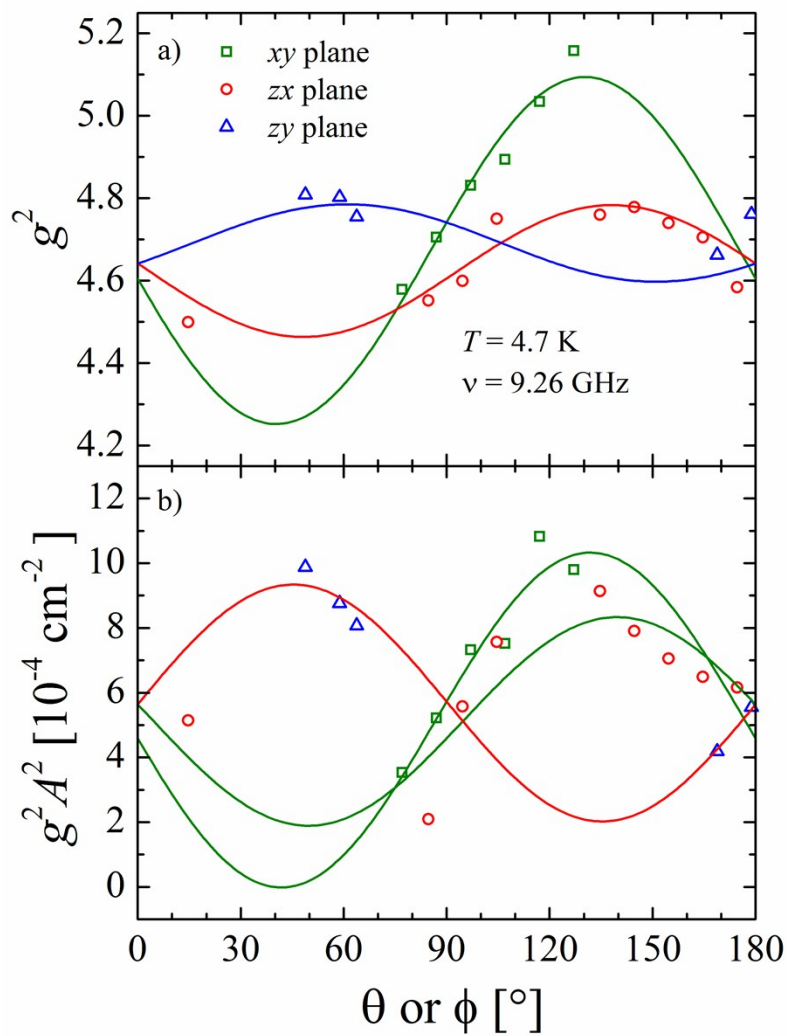

**Fig S6:** Double integration of the signal observed for allowed ( $\Delta M_S = 1$ ) and forbidden ( $\Delta M_S = 2$ ) transitions in the relevant field ranges. The jumps of this integral corresponds to the areas of these peaks, that are related by a factor of  $\sim 1000$ .

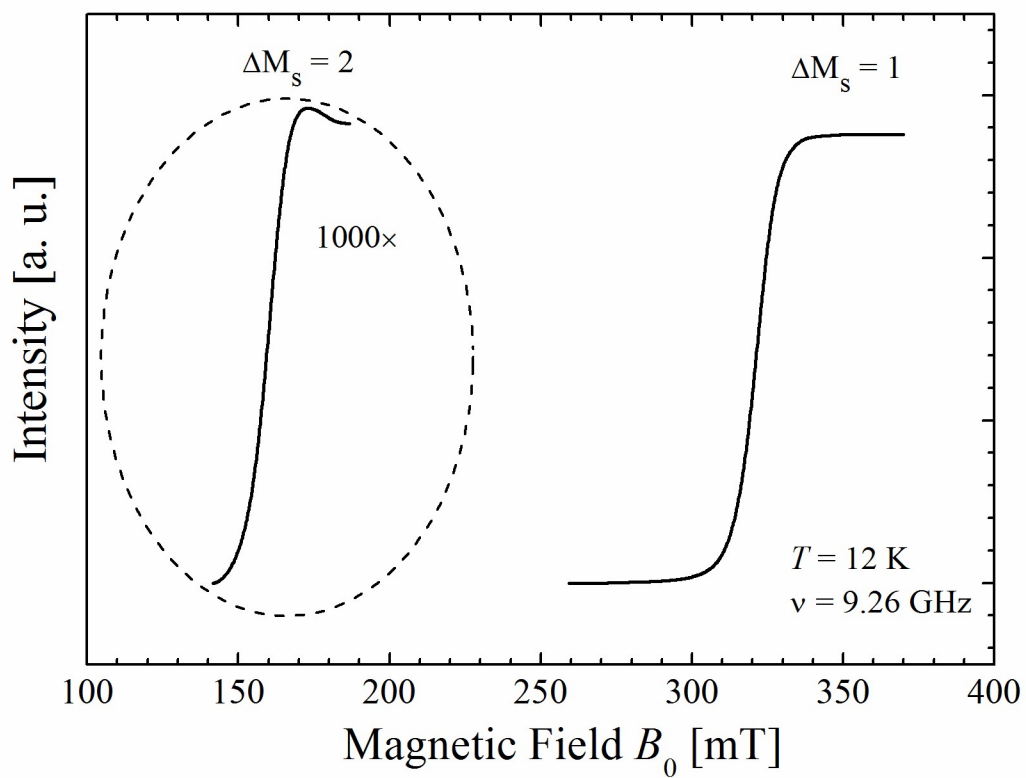

**Fig. S7** Full set of spectra observed around 160 mT and  $T$  between 4 and 50 K for the magnetic field applied at  $70^\circ$  with the  $x$  axis in the  $xy$  laboratory plane, as indicated with the arrow in the Figure 8.

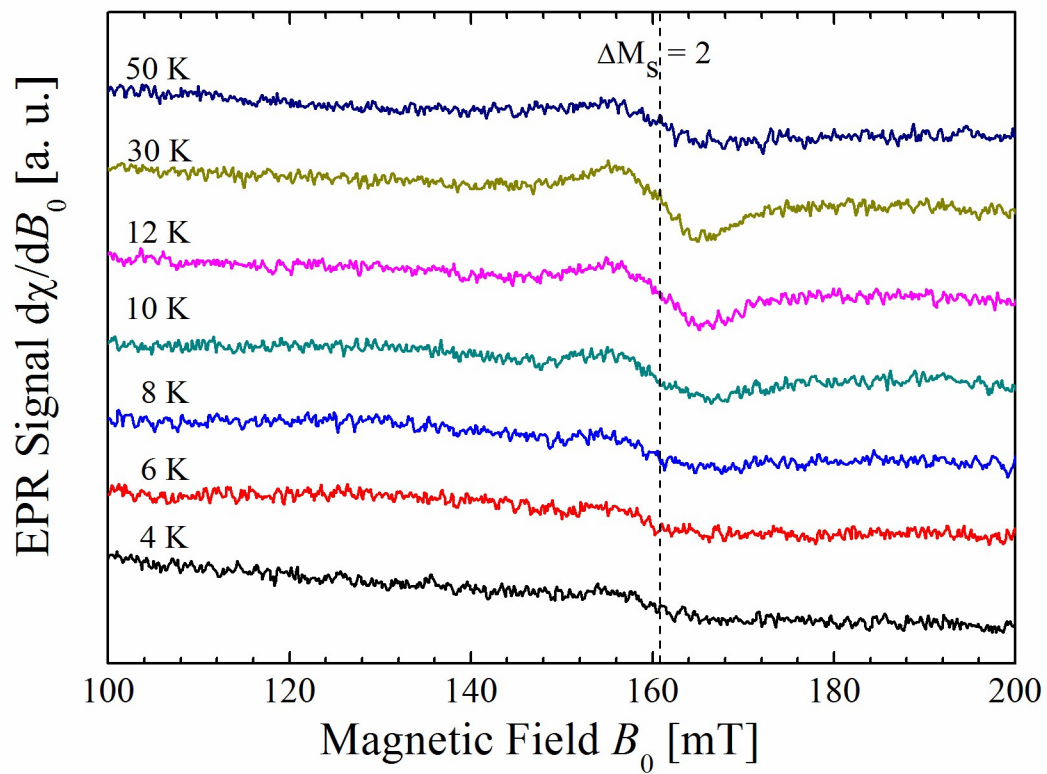

**Table S1:** Eigenvalues and eigenvectors of the  $\mathbf{g}_{M_2}$  and  $\mathbf{A}_{M_2}$  matrices of mononuclear site  $M_2$ , calculated from the EPR results at 4.7 K in Figures S3 and S4.

|       | Eigenvalues                       |          | Eigenvectors |          |
|-------|-----------------------------------|----------|--------------|----------|
| $g_1$ | 2.06(8)                           | 0.77(1)  | 0.60(4)      | 0.18(8)  |
| $g_2$ | 2.014(5)                          | -0.06(8) | 0.36(4)      | -0.93(1) |
| $g_3$ | 2.269(4)                          | -0.63(1) | 0.71(1)      | 0.31(1)  |
| $A_1$ | 80(10) $10^{-4} \text{ cm}^{-1}$  | 0.73(5)  | 0.67(5)      | -0.0(1)  |
| $A_2$ | 0(20) $10^{-4} \text{ cm}^{-1}$   | -0.4(1)  | 0.4(1)       | -0.84(2) |
| $A_3$ | 160(10) $10^{-4} \text{ cm}^{-1}$ | -0.56(2) | 0.63(2)      | 0.53(2)  |
